# Supplementary material
Source: HighWire-hosted journal article supplement (https://www.annfammed.org/highwire/filestream/7526/field_highwire_adjunct_files/1/Fleming_Fig_2.pdf)

Online Supplementary Material

Grossberg PM, Brown DD, Fleming MF. Brief physician advice for high-risk drinking among young adults. *Ann Fam Med*. 2004;2:474-480.

<http://www.annfammed.org/cgi/content/full/2/5/474/DC1>

**Figure 2. Mean total number of drinks in the previous 7 days.**

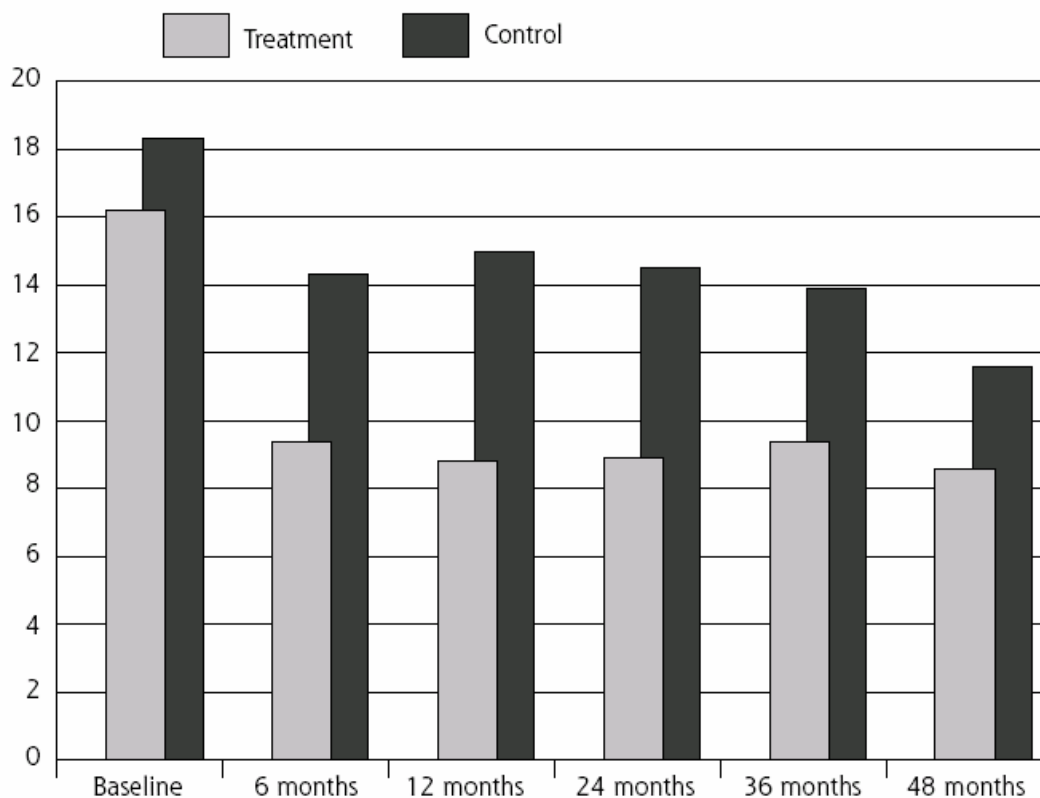

Supplement: Fleming_Fig_2.pdf [file Fleming_Fig_2.pdf]
